# Supplementary material for: Novel A-π-D-A organic dyes for better photovoltaic performance
Source: Royal Society of Chemistry journal article supplement (doi:10.1039/d4ra05341a), 2024-01-01
Supplement: d4ra05341a1.pdf [file d4ra05341a1.pdf]

## Novel A- $\pi$ -D-A organic dyes for better Photovoltaic performance

Krupa Elsa Roys<sup>a</sup>, Manju S L<sup>a,\*</sup>, Mohamed Siddiq<sup>b</sup>, Anandan Sambandam<sup>b</sup>.

<sup>a</sup>Department of Chemistry, School of Advanced Sciences, Vellore Institute of Technology, Vellore-632014, India. Email: [slmanju@vit.ac.in](mailto:slmanju@vit.ac.in)

<sup>b</sup>Nanomaterials and Solar Energy Conversion Laboratory, Department of Chemistry, National Institute of Technology, Trichy- 620015, India. Email: [sanand@nitt.edu](mailto:sanand@nitt.edu)

### Scanned copies of spectra (FTIR, <sup>1</sup>H and <sup>13</sup>C NMR, HRMS)

1. 3-(5-(3-((2-carboxy-2-cyanovinyl)-1-pentyl-1H-indol-5-yl)thiophen-2-yl)-2-isocyanoacrylic acid (In-T-2C)

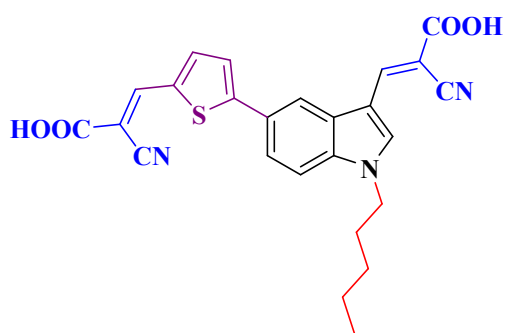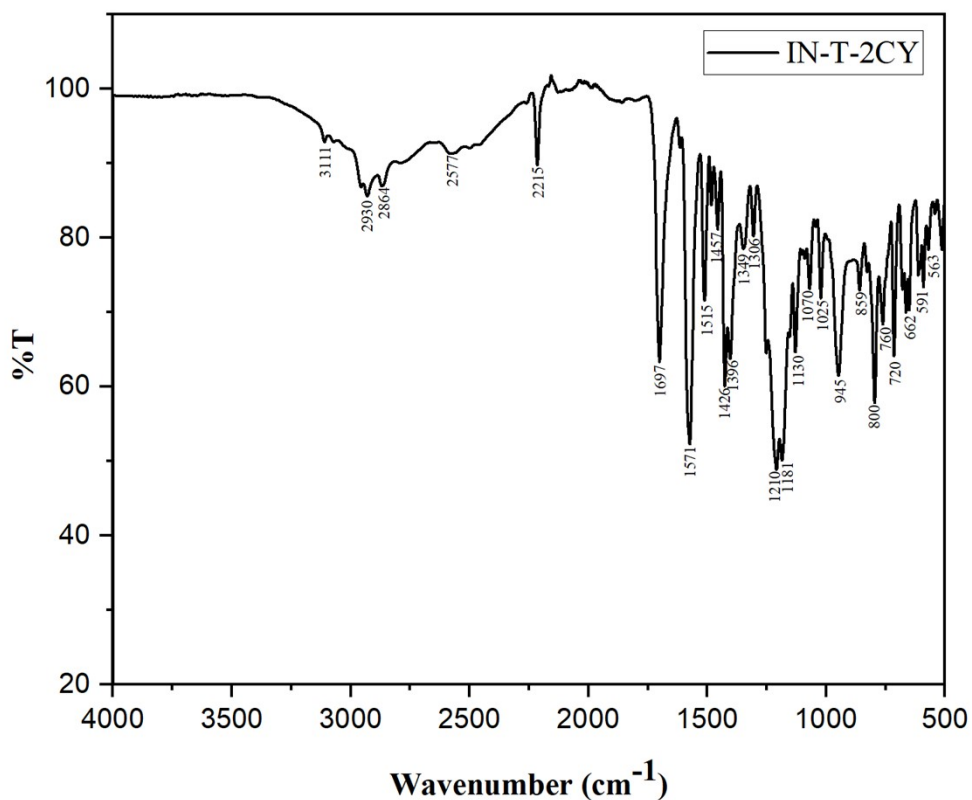

Signature SIF VIT VELLORE  
IN-T-2A

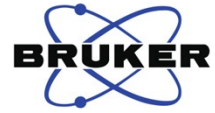

Current Data Parameters  
NAME Dr.SLM270323  
EXPNO 20  
PROCNO 1

F2 - Acquisition Parameters  
Date\_ 20230327  
Time\_ 13.19 h  
INSTRUM spect  
PROBHD Z108618\_0505 (  
PULPROG zg30  
TD 65536  
SOLVENT DMSO  
NS 32  
DS 2  
SWH 8012.820 Hz  
FIDRES 0.244532 Hz  
AQ 4.0894465 sec  
RG 143.73  
DW 62.400 usec  
DE 6.50 usec  
TE 306.6 K  
D1 1.00000000 sec  
TD0 1  
SFO1 400.2604716 MHz  
NUC1 1H  
P1 15.00 usec  
PLW1 14.95499992 W

F2 - Processing parameters  
SI 65536  
SF 400.2580031 MHz  
WDW EM  
SSB 0  
LB 0.30 Hz  
GB 0  
PC 1.00

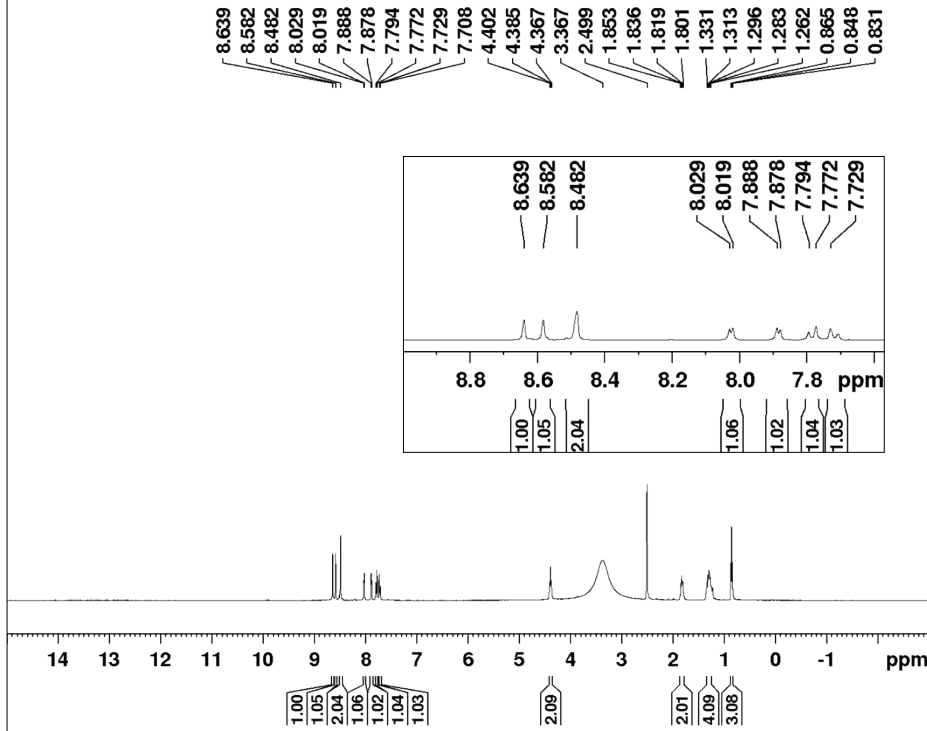

Signature SIF VIT VELLORE  
IN-T-2CY

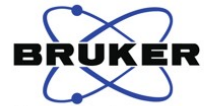

Current Data Parameters  
NAME Dr.SLM280323  
EXPNO 26  
PROCNO 1

F2 - Acquisition Parameters  
Date\_ 20230329  
Time\_ 5.30 h  
INSTRUM spect  
PROBHD Z108618\_0505 (  
PULPROG zgpg30  
TD 65536  
SOLVENT DMSO  
NS 512  
DS 4  
SWH 24038.461 Hz  
FIDRES 0.733596 Hz  
AQ 1.3631488 sec  
RG 199.6  
DW 20.800 usec  
DE 6.50 usec  
TE 304.1 K  
D1 2.00000000 sec  
D11 0.03000000 sec  
TD0 1  
SFO1 100.6550186 MHz  
NUC1 13C  
P1 10.00 usec  
PLW1 58.22499847 W  
SFO2 400.2596010 MHz  
NUC2 1H  
CPDPRG2 waltz16  
PCPD2 90.00 usec  
PLW2 14.95499992 W  
PLW12 0.41542000 W  
PLW13 0.20895000 W

F2 - Processing parameters  
SI 32768  
SF 100.6449542 MHz  
WDW EM  
SSB 0  
LB 1.00 Hz  
GB 0  
PC 1.40

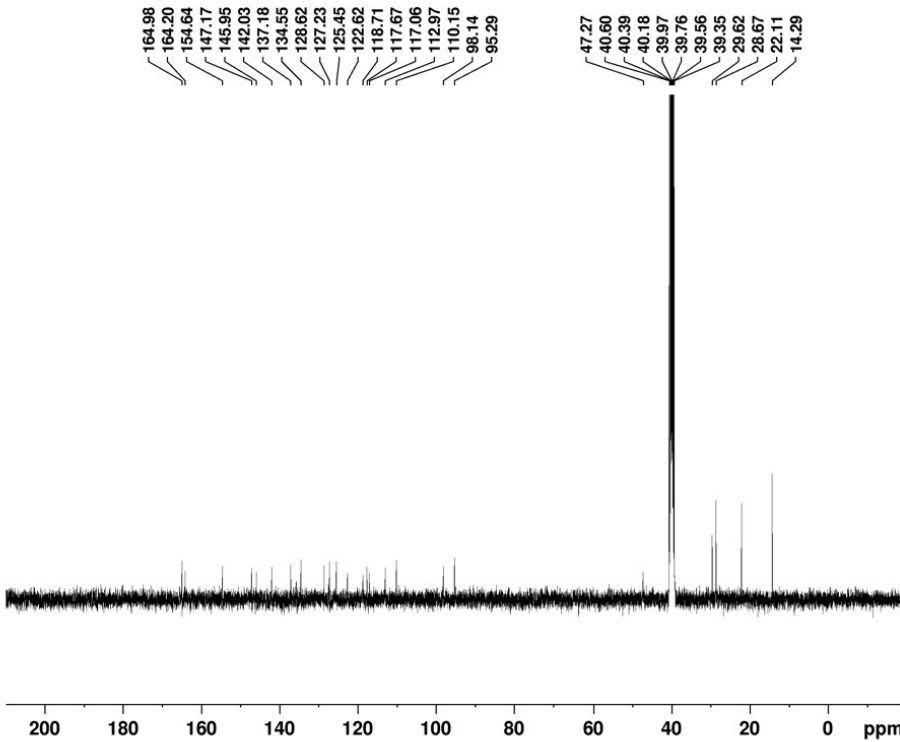

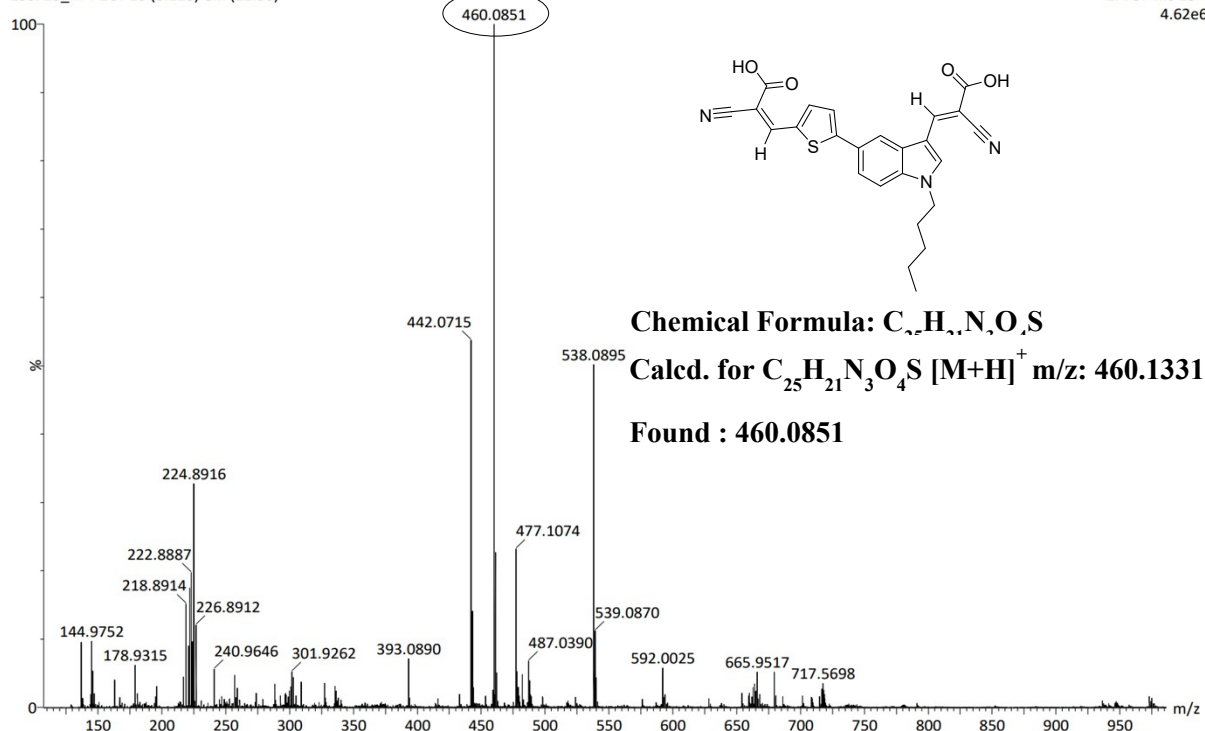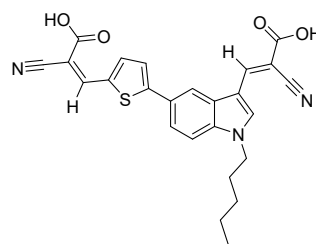

**Chemical Formula: C<sub>25</sub>H<sub>21</sub>N<sub>3</sub>O<sub>4</sub>S**

**Calcd. for C<sub>25</sub>H<sub>21</sub>N<sub>3</sub>O<sub>4</sub>S [M+H]<sup>+</sup> m/z: 460.1331**

**Found : 460.0851**

2. 2-cyano-3-(5-(4-cyanophenyl)-1-pentyl-1H-indol-3-yl)acrylic acid (In-B-C)

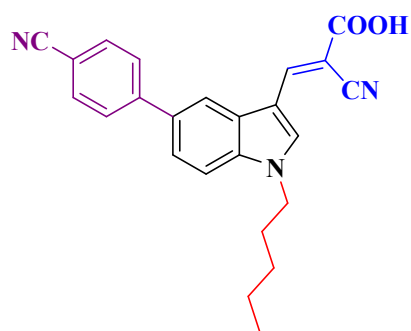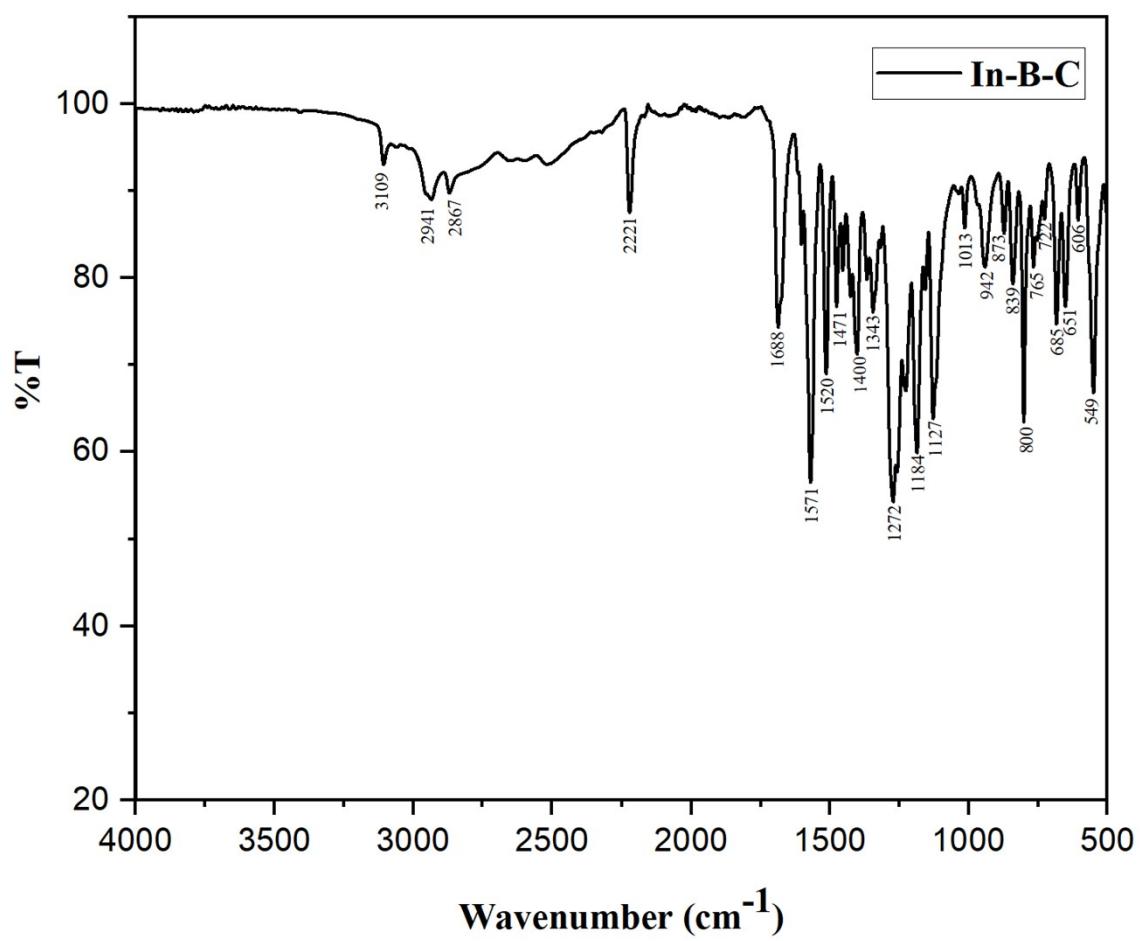

Signature SIF VIT VELLORE  
IN-B-CN

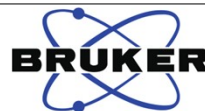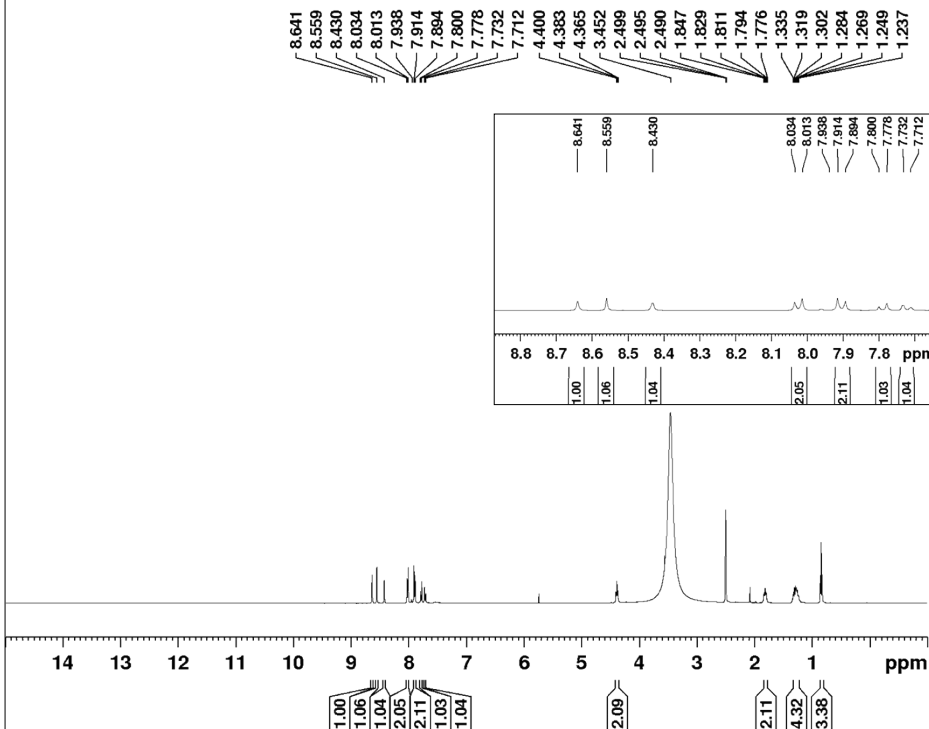

Current Data Parameters  
NAME Dr.SLM180723  
EXPNO 9  
PROCNO 1

F2 - Acquisition Parameters  
Date\_ 20230718  
Time 13.03 h  
INSTRUM spect  
PROBHD Z108618\_0505 (  
PULPROG zg30  
TD 65536  
SOLVENT DMSO  
NS 32  
DS 2  
SWH 8012.820 Hz  
FIDRES 0.244532 Hz  
AQ 4.0894465 sec  
RG 98.85  
DW 62.400 usec  
DE 6.50 usec  
TE 301.6 K  
D1 1.00000000 sec  
TD0 1  
SFO1 400.2604716 MHz  
NUC1 1H  
P1 15.00 usec  
PLW1 14.95499992 W

F2 - Processing parameters  
SI 65536  
SF 400.2580048 MHz  
WDW EM  
SSB 0  
LB 0.30 Hz  
GB 0  
PC 1.00

Signature SIF VIT VELLORE  
IN-B-CN

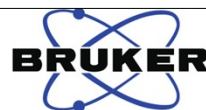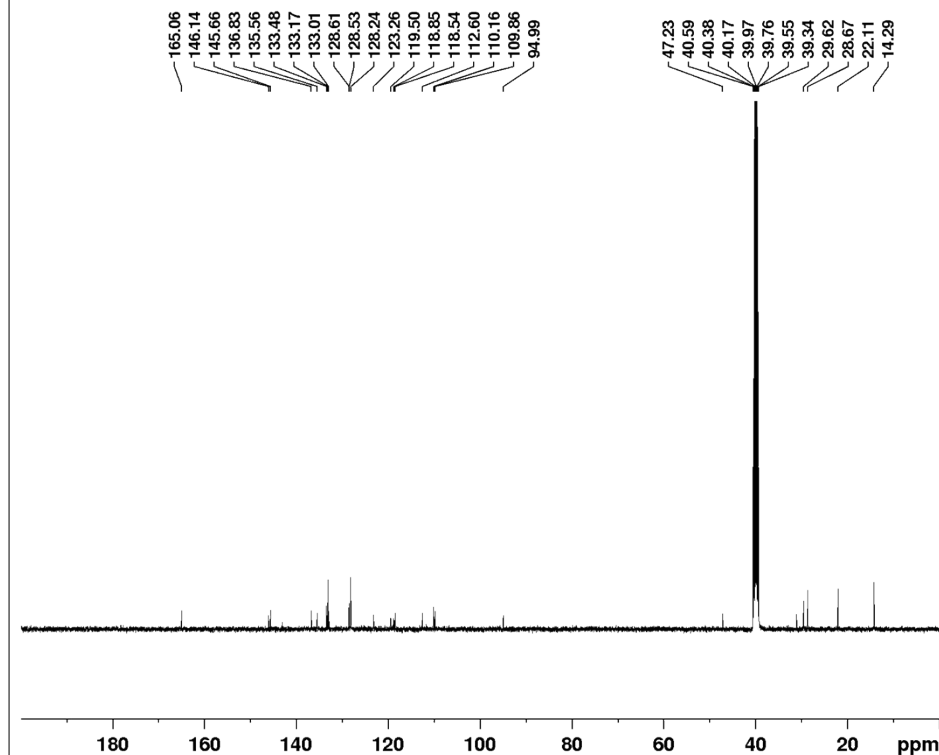

Current Data Parameters  
NAME Dr.SLM141223  
EXPNO 17  
PROCNO 1

F2 - Acquisition Parameters  
Date\_ 20231215  
Time 7.04 h  
INSTRUM spect  
PROBHD Z108618\_0505 (  
PULPROG zgpg30  
TD 65536  
SOLVENT DMSO  
NS 512  
DS 4  
SWH 24038.461 Hz  
FIDRES 0.733596 Hz  
AQ 1.3631488 sec  
RG 199.6  
DW 20.800 usec  
DE 6.50 usec  
TE 303.0 K  
D1 2.00000000 sec  
D11 0.03000000 sec  
TD0 1  
SFO1 100.6550186 MHz  
NUC1 13C  
P1 10.00 usec  
PLW1 56.49300003 W  
SFO2 400.2596010 MHz  
NUC2 1H  
CPDPRG2 waltz16  
PCPD2 90.00 usec  
PLW2 15.21399975 W  
PLW12 0.42261001 W  
PLW13 0.21257000 W

F2 - Processing parameters  
SI 32768  
SF 100.6449542 MHz  
WDW EM  
SSB 0  
LB 1.00 Hz  
GB 0  
PC 1.40

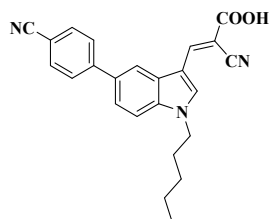

**Chemical Formula:  $C_{24}H_{21}N_3O_2$**   
**Calcd. For  $C_{24}H_{21}N_3O_2$   $[M+H]^+$  m/z: 384.1712,**  
**Found: 384.1716**

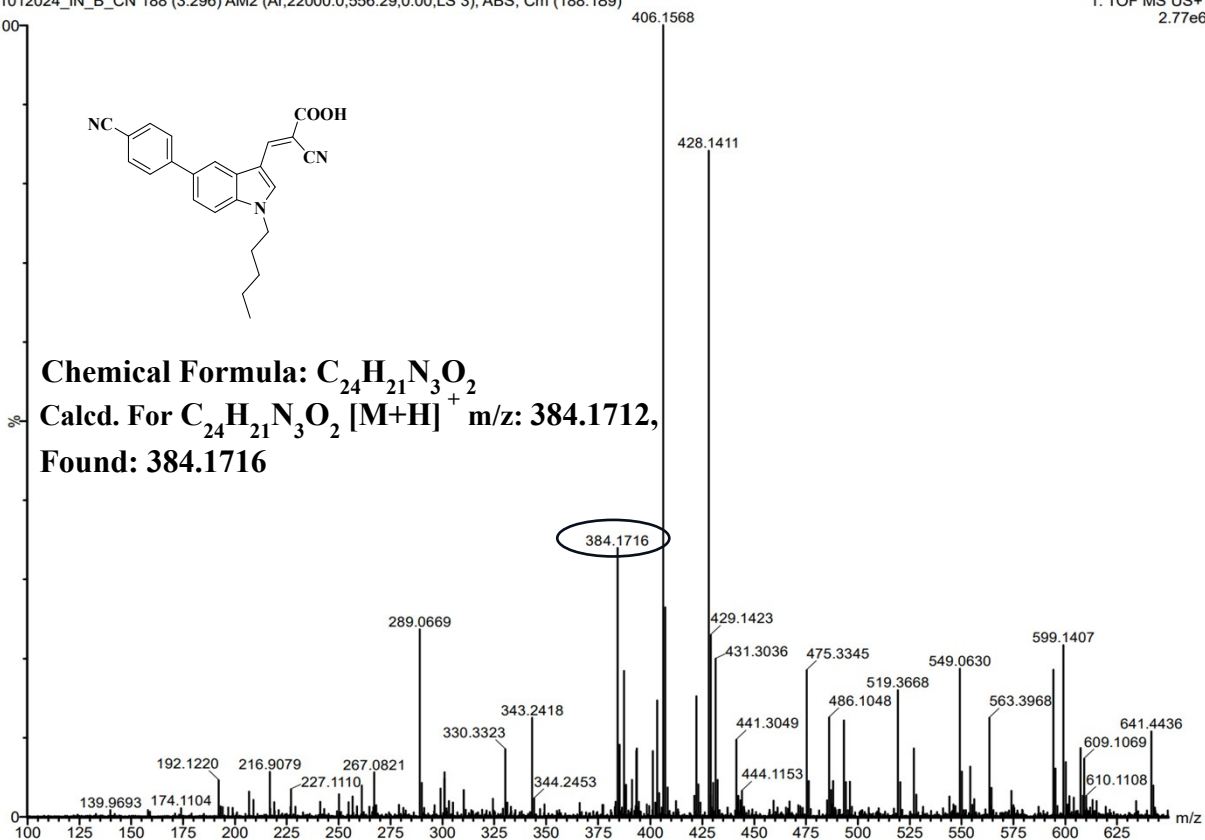

3. 5-bromo-1-pentyl-1H-indole-3-carbaldehyde (1a)

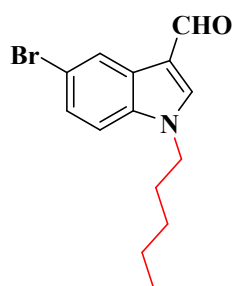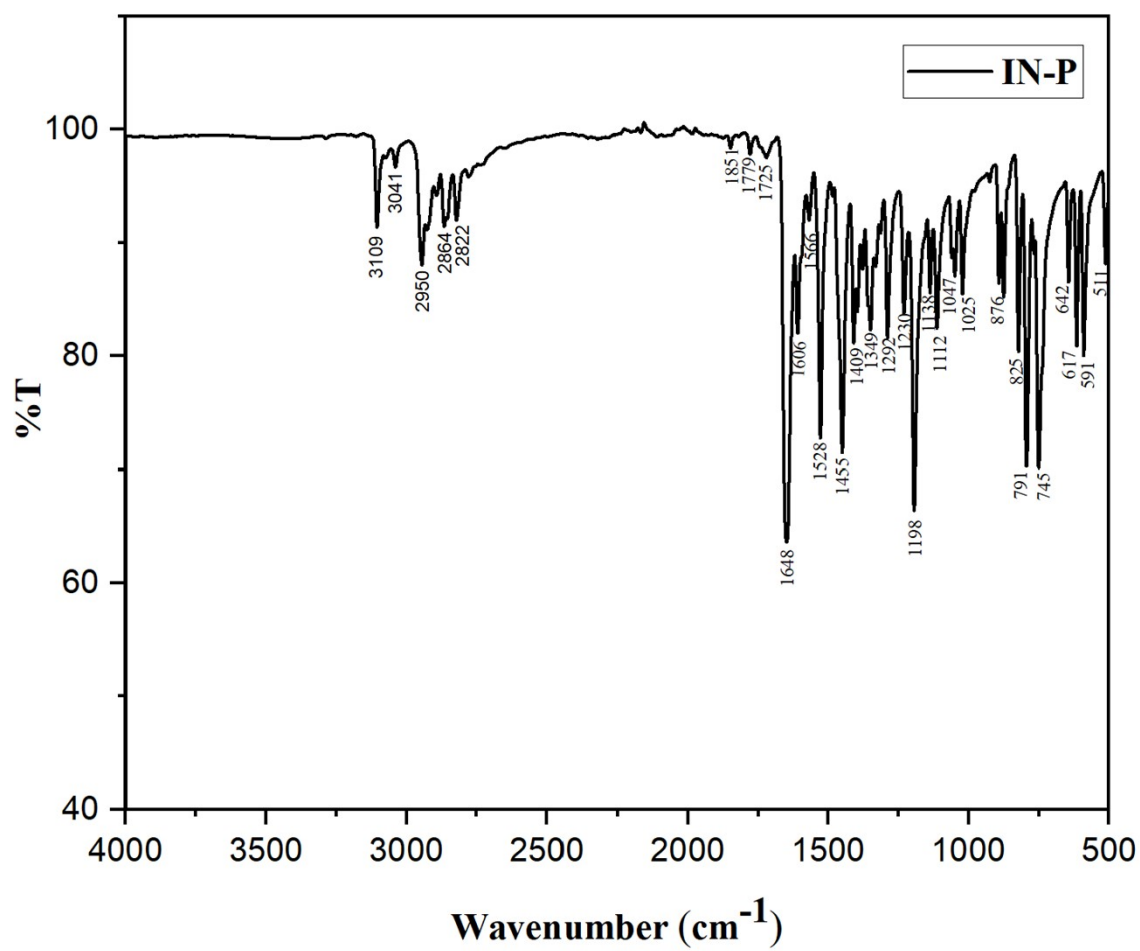

Signature SIF VIT VELLORE  
IN-P

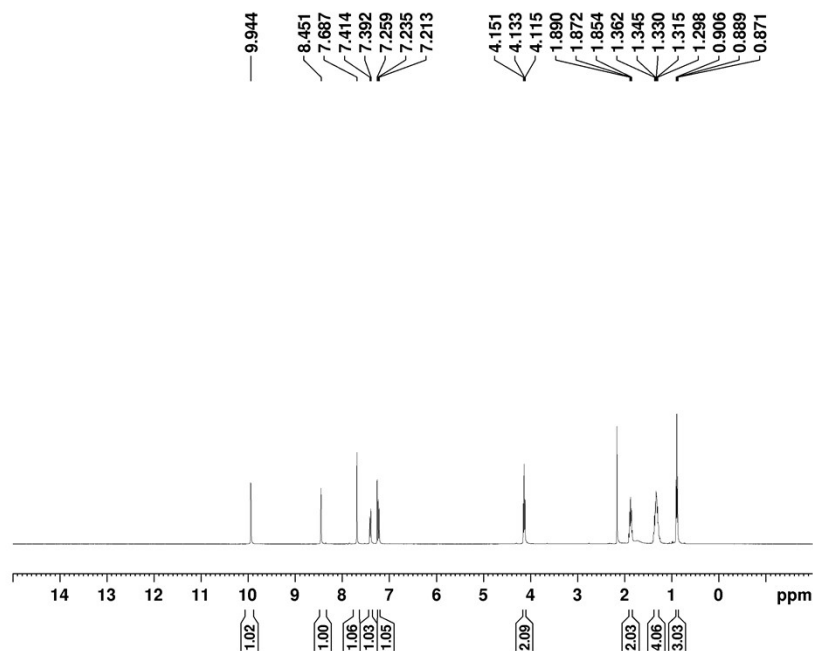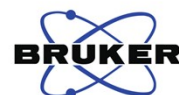

Current Data Parameters  
NAME Dr.SLM280624  
EXPNO 27  
PROCNO 1

F2 - Acquisition Parameters  
Date\_ 20240628  
Time 17.09 h  
INSTRUM spect  
PROBHD Z108618\_0505 (  
PULPROG zg30  
TD 65536  
SOLVENT CDCl3  
NS 32  
DS 2  
SWH 8012.820 Hz  
FIDRES 0.244532 Hz  
AQ 4.0894465 sec  
RG 112.69  
DW 62.400 usec  
DE 6.50 usec  
TE 303.8 K  
D1 1.00000000 sec  
TD0 1  
SFO1 400.2604716 MHz  
NUC1 1H  
P1 15.00 usec  
PLW1 15.21399975 W

F2 - Processing parameters  
SI 65536  
SF 400.2580100 MHz  
WDW EM  
SSB 0  
LB 0.30 Hz  
GB 0  
PC 1.00

Signature SIF VIT VELLORE  
IN-P

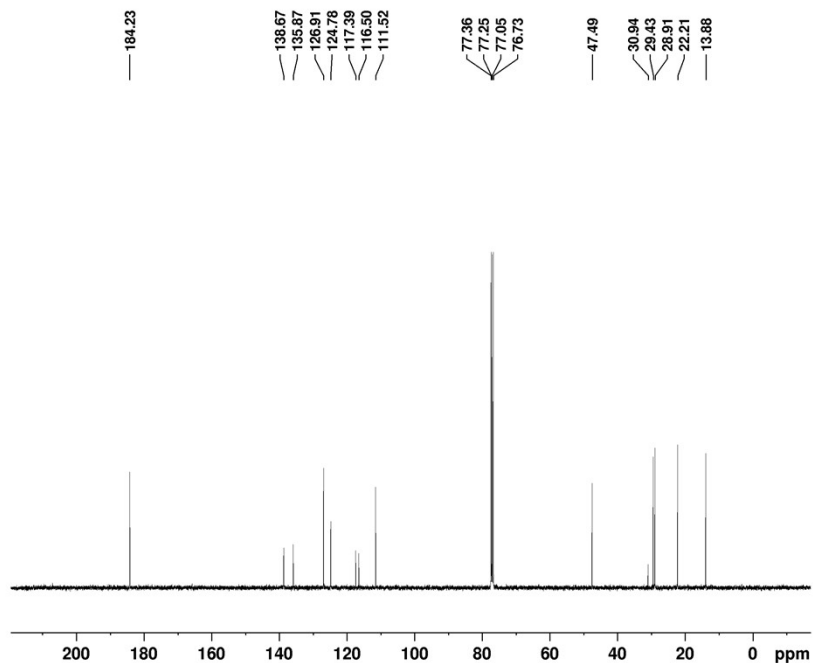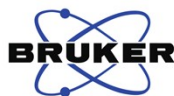

Current Data Parameters  
NAME Dr.SLM280624  
EXPNO 28  
PROCNO 1

F2 - Acquisition Parameters  
Date\_ 20240628  
Time 17.40 h  
INSTRUM spect  
PROBHD Z108618\_0505 (  
PULPROG zgpg30  
TD 65536  
SOLVENT CDCl3  
NS 512  
DS 4  
SWH 24038.461 Hz  
FIDRES 0.733596 Hz  
AQ 1.3631488 sec  
RG 199.6  
DW 20.800 usec  
DE 6.50 usec  
TE 304.3 K  
D1 2.00000000 sec  
D11 0.03000000 sec  
TD0 1  
SFO1 100.6550186 MHz  
NUC1 13C  
P1 10.00 usec  
PLW1 56.49300003 W  
SFO2 400.2596010 MHz  
NUC2 1H  
CPDPRG2 waltz16  
PCPD2 90.00 usec  
PLW2 15.21399975 W  
PLW12 0.42261001 W  
PLW13 0.21257000 W

F2 - Processing parameters  
SI 32768  
SF 100.6449542 MHz  
WDW EM  
SSB 0  
LB 1.00 Hz  
GB 0  
PC 1.40



4. 5-(5-formylthiophen-2-yl)-1-pentyl-1*H*-indole-3-carbaldehyde (2b)

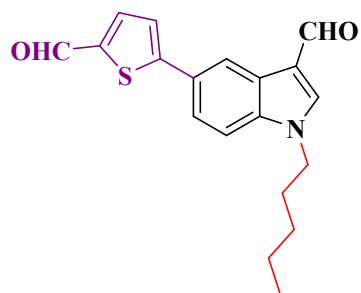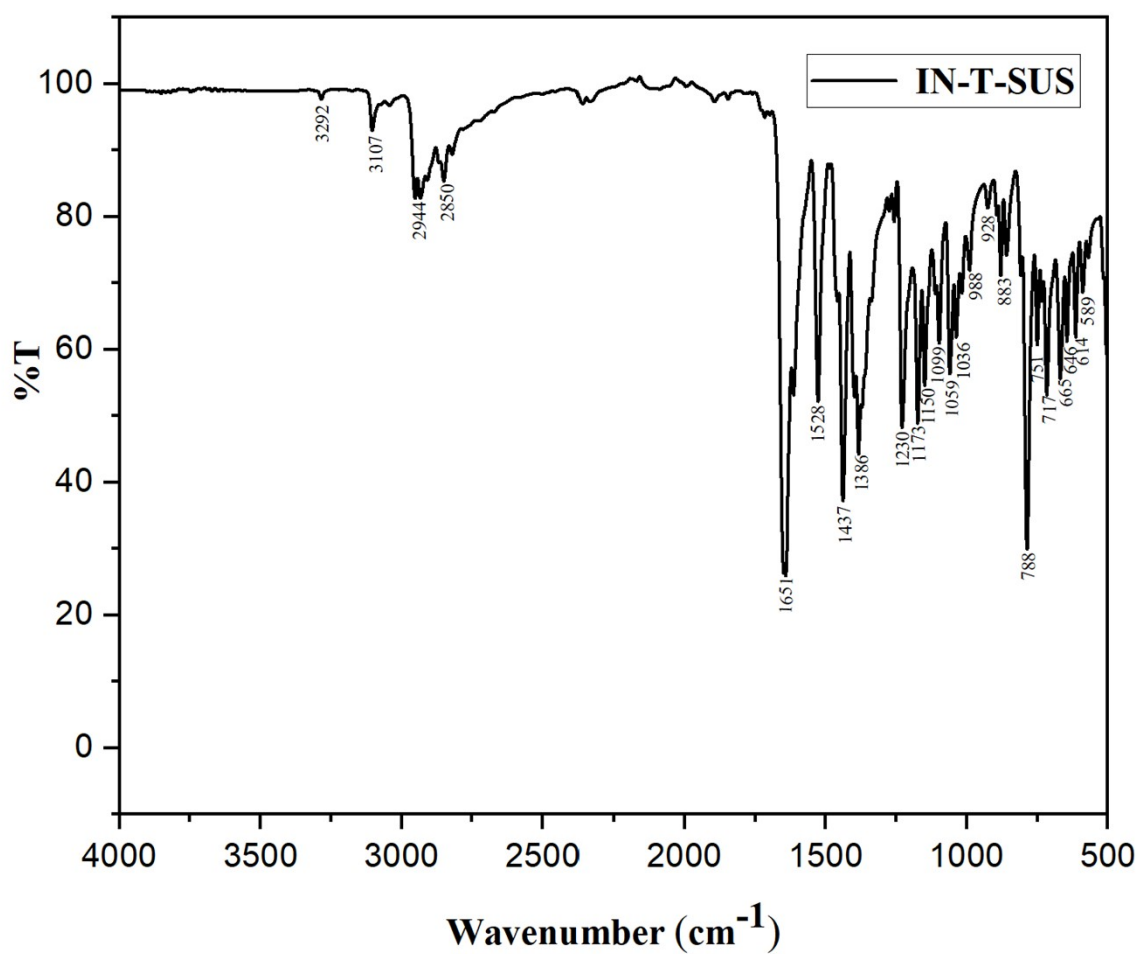

Signature SIF VIT VELLORE  
IN-T-SUS

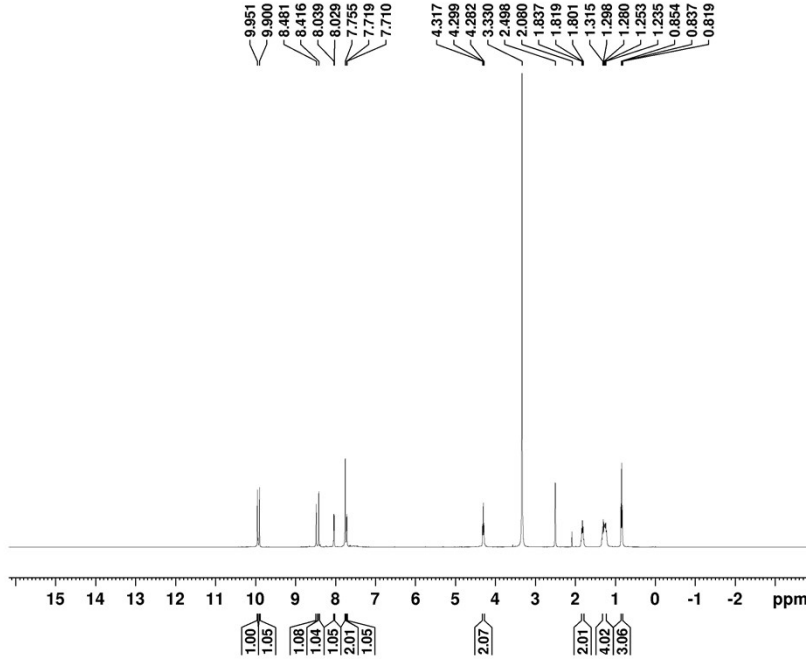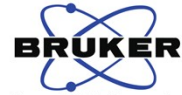

Current Data Parameters  
NAME Dr.SLM230323  
EXPNO 12  
PROCNO 1

F2 - Acquisition Parameters  
Date\_ 20230323  
Time 15.40 h  
INSTRUM spect  
PROBHD Z108618\_0505 (  
PULPROG zg30  
TD 65536  
SOLVENT DMSO  
NS 32  
DS 2  
SWH 8012.820 Hz  
FIDRES 0.244532 Hz  
AQ 4.0894465 sec  
RG 127.79  
DW 62.400 usec  
DE 6.50 usec  
TE 306.6 K  
D1 1.00000000 sec  
TD0 1  
SFO1 400.2604716 MHz  
NUC1 1H  
P1 15.00 usec  
PLW1 14.9549992 W

F2 - Processing parameters  
SI 65536  
SF 400.2580036 MHz  
WDW EM  
SSB 0  
LB 0.30 Hz  
GB 0  
PC 1.00

Signature SIF VIT VELLORE  
IN-T-SUS

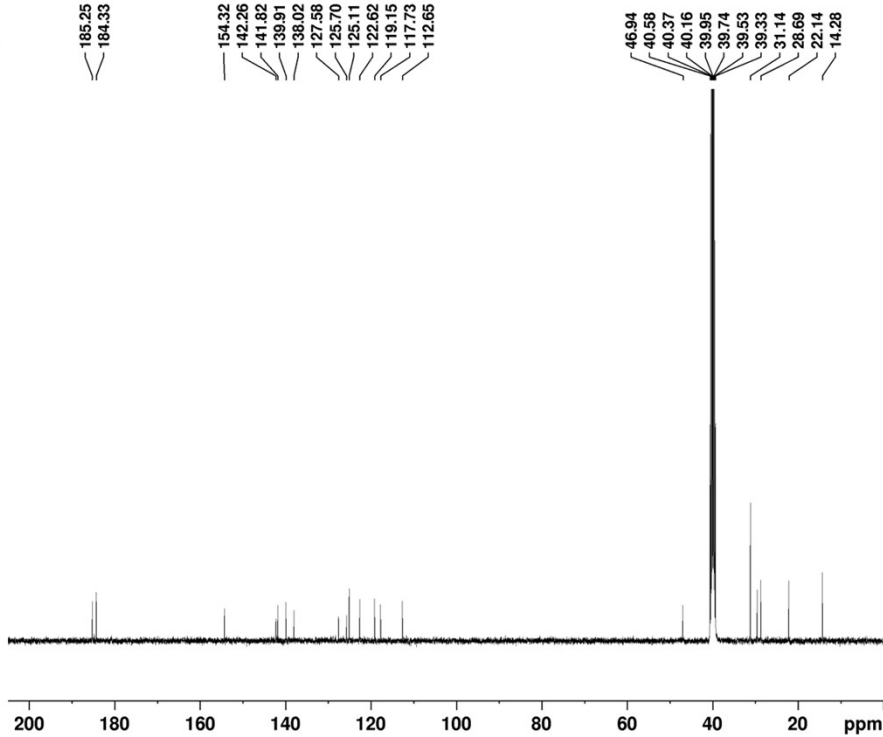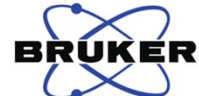

Current Data Parameters  
NAME Dr.SLM170423  
EXPNO 31  
PROCNO 1

F2 - Acquisition Parameters  
Date\_ 20230417  
Time 16.38 h  
INSTRUM spect  
PROBHD Z108618\_0505 (  
PULPROG zgpg30  
TD 65536  
SOLVENT DMSO  
NS 512  
DS 4  
SWH 24038.461 Hz  
FIDRES 0.733596 Hz  
AQ 1.3631488 sec  
RG 199.6  
DW 20.800 usec  
DE 6.50 usec  
TE 305.0 K  
D1 2.00000000 sec  
D11 0.03000000 sec  
TD0 1  
SFO1 100.6550186 MHz  
NUC1 13C  
P1 10.00 usec  
PLW1 58.22499847 W  
SFO2 400.2596010 MHz  
NUC2 1H  
CPDPRG2 waltz16  
PCPD2 90.00 usec  
PLW2 14.9549992 W  
PLW12 0.41542000 W  
PLW13 0.20895000 W

F2 - Processing parameters  
SI 32768  
SF 100.6449542 MHz  
WDW EM  
SSB 0  
LB 1.00 Hz  
GB 0  
PC 1.40

5. 4-(3-formyl-1-pentyl-1*H*-indol-5-yl)benzonitrile (2c)

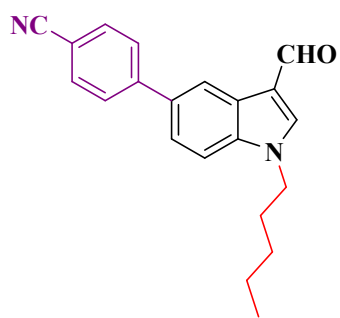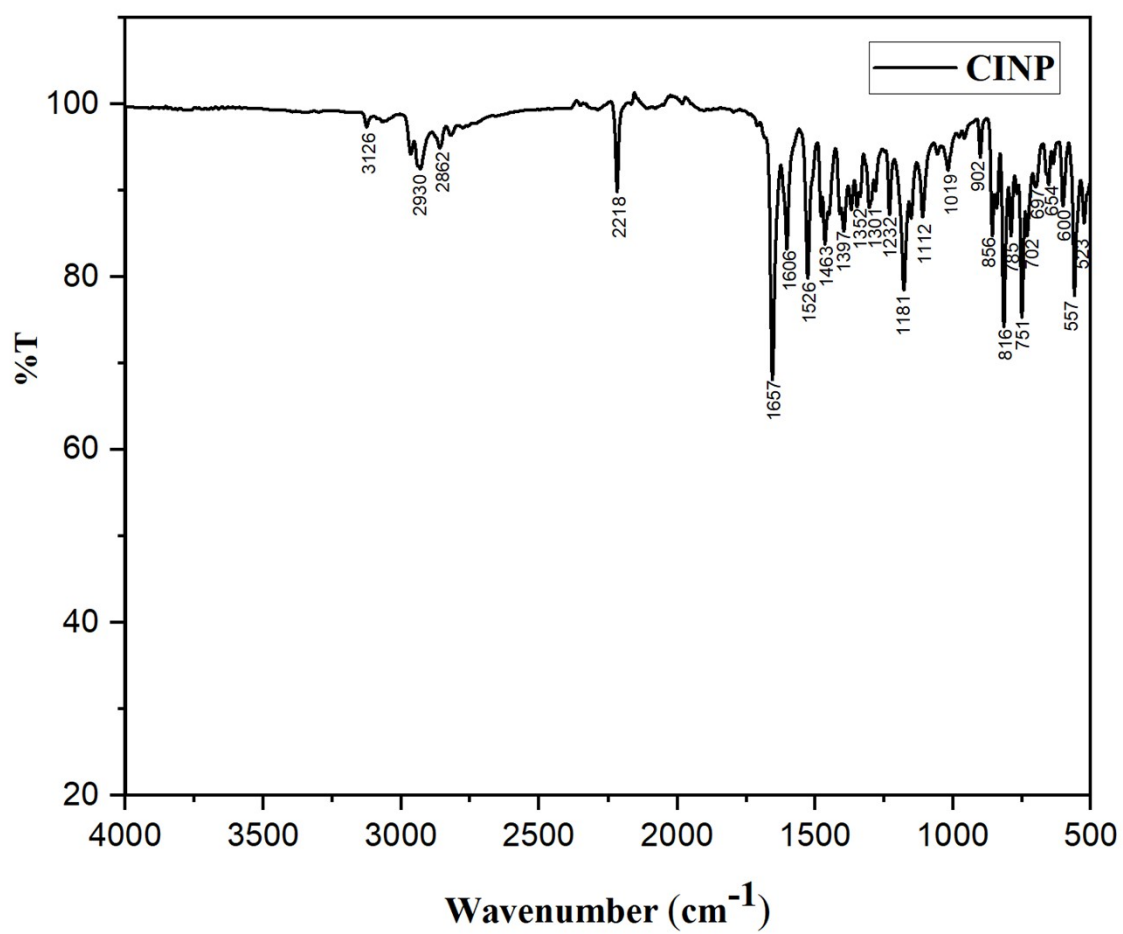

Signature SIF VIT VELLORE  
CINP

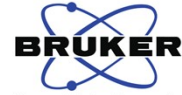

Current Data Parameters  
NAME Dr.SLM040724  
EXPNO 1  
PROCNO 1

F2 - Acquisition Parameters  
Date\_ 20240704  
Time 19.00 h  
INSTRUM spect  
PROBHD Z108618\_0505 (  
PULPROG zg30  
TD 65536  
SOLVENT CDCl3  
NS 32  
DS 2  
SWH 8012.820 Hz  
FIDRES 0.244532 Hz  
AQ 4.0894465 sec  
RG 88.69  
DW 62.400 usec  
DE 6.50 usec  
TE 303.6 K  
D1 1.00000000 sec  
TD0 1  
SFO1 400.2604716 MHz  
NUC1 1H  
P1 15.00 usec  
PLW1 15.21399975 W

F2 - Processing parameters  
SI 65536  
SF 400.2580097 MHz  
WDW EM  
SSB 0  
LB 0.30 Hz  
GB 0  
PC 1.00

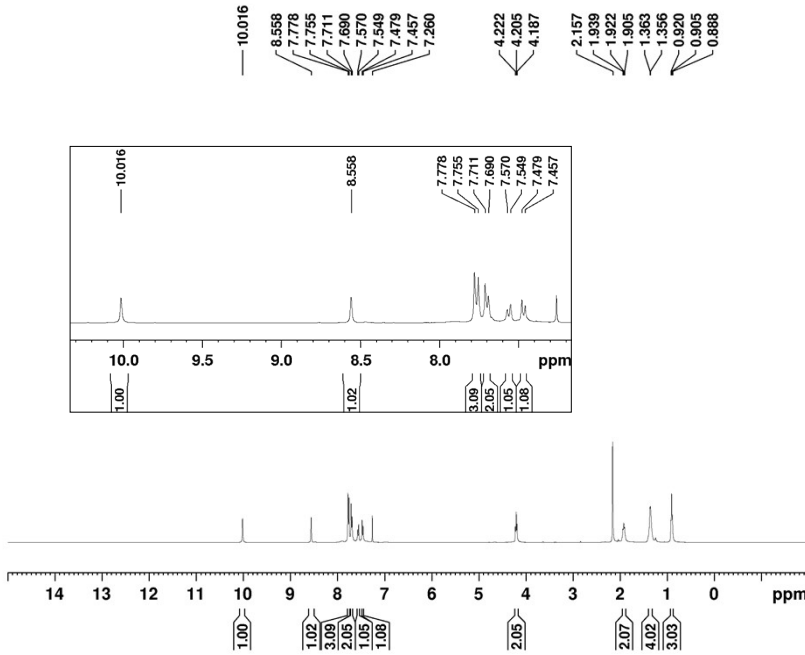

Signature SIF VIT VELLORE  
CINP

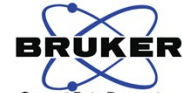

Current Data Parameters  
NAME Dr.SLM040724  
EXPNO 2  
PROCNO 1

F2 - Acquisition Parameters  
Date\_ 20240704  
Time 19.31 h  
INSTRUM spect  
PROBHD Z108618\_0505 (  
PULPROG zgpg30  
TD 65536  
SOLVENT CDCl3  
NS 512  
DS 4  
SWH 24038.461 Hz  
FIDRES 0.733596 Hz  
AQ 1.3631488 sec  
RG 199.6  
DW 20.800 usec  
DE 6.50 usec  
TE 304.2 K  
D1 2.00000000 sec  
D11 0.03000000 sec  
TD0 1  
SFO1 100.6550186 MHz  
NUC1 13C  
P1 10.00 usec  
PLW1 56.49300003 W  
SFO2 400.2596010 MHz  
NUC2 1H  
CPDPRG2 waltz16  
PCPD2 90.00 usec  
PLW2 15.21399975 W  
PLW12 0.42261001 W  
PLW13 0.21257000 W

F2 - Processing parameters  
SI 32768  
SF 100.6449542 MHz  
WDW EM  
SSB 0  
LB 1.00 Hz  
GB 0  
PC 1.40

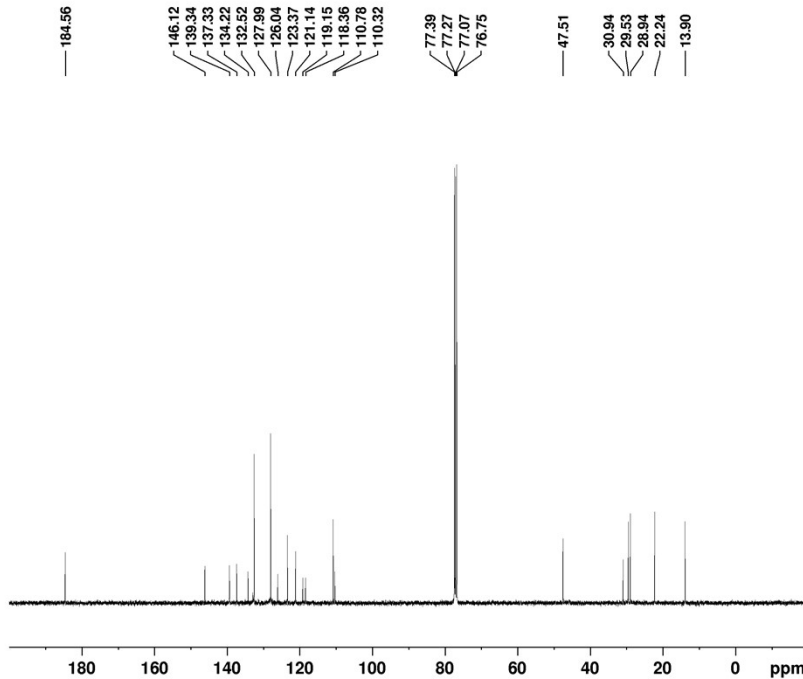

**Crystallographic data of 3-(5-(3-((2-carboxy-2-cyanovinyl)-1-pentyl-1*H*-indol-5-yl)thiophen-2-yl)-2-isocyanoacrylic acid (In-T-2C)**

**InT2CY\_030723\_0m**

**Table 1 Crystal data and structure refinement for InT2CY\_030723\_0m.**

|                                             |                                                                 |
|---------------------------------------------|-----------------------------------------------------------------|
| Identification code                         | InT2CY_030723_0m                                                |
| Empirical formula                           | C <sub>25</sub> H <sub>21</sub> N <sub>3</sub> O <sub>4</sub> S |
| Formula weight                              | 459.5200                                                        |
| Temperature/K                               | 300.00                                                          |
| Crystal system                              | triclinic                                                       |
| Space group                                 | P-1                                                             |
| a/Å                                         | 10.4665(7)                                                      |
| b/Å                                         | 10.8561(8)                                                      |
| c/Å                                         | 16.2199(11)                                                     |
| α/°                                         | 86.643(3)                                                       |
| β/°                                         | 76.578(2)                                                       |
| γ/°                                         | 61.751(2)                                                       |
| Volume/Å <sup>3</sup>                       | 1576.31(19)                                                     |
| Z                                           | 4                                                               |
| ρ <sub>calc</sub> /cm <sup>3</sup>          | 0.968                                                           |
| μ/mm <sup>-1</sup>                          | 0.130                                                           |
| F(000)                                      | 480.6                                                           |
| Crystal size/mm <sup>3</sup>                | 0.234 × 0.179 × 0.087                                           |
| Radiation                                   | Mo Kα (λ = 0.71073)                                             |
| 2θ range for data collection/°              | 4.54 to 50.12                                                   |
| Index ranges                                | -12 ≤ h ≤ 12, -12 ≤ k ≤ 12, -19 ≤ l ≤ 19                        |
| Reflections collected                       | 38218                                                           |
| Independent reflections                     | 5535 [R <sub>int</sub> = 0.0660, R <sub>sigma</sub> = 0.0500]   |
| Data/restraints/parameters                  | 5535/2/299                                                      |
| Goodness-of-fit on F <sup>2</sup>           | 1.224                                                           |
| Final R indexes [I ≥ 2σ (I)]                | R <sub>1</sub> = 0.0873, wR <sub>2</sub> = 0.2923               |
| Final R indexes [all data]                  | R <sub>1</sub> = 0.1375, wR <sub>2</sub> = 0.3620               |
| Largest diff. peak/hole / e Å <sup>-3</sup> | 0.42/-0.47                                                      |

**Table 2 Fractional Atomic Coordinates ( $\times 10^4$ ) and Equivalent Isotropic Displacement Parameters ( $\text{\AA}^2 \times 10^3$ ) for InT2CY\_030723\_0m.  $U_{\text{eq}}$  is defined as 1/3 of the trace of the orthogonalised  $U_{\text{IJ}}$  tensor.**

| Atom | x           | y           | z          | U(eq)      |
|------|-------------|-------------|------------|------------|
| S2   | 5388.3 (14) | 1915.0 (13) | 4213.6 (8) | 71.3 (4)   |
| O2   | 11313 (4)   | 613 (4)     | 3107 (3)   | 94.6 (11)  |
| C21  | 2927 (5)    | 2134 (4)    | 5426 (3)   | 61.9 (12)  |
| N20  | -1560 (4)   | 3235 (4)    | 5959 (3)   | 68.3 (10)  |
| C1   | -517 (5)    | 4152 (4)    | 3809 (3)   | 65.2 (12)  |
| C3   | 4508 (5)    | 1755 (4)    | 5219 (3)   | 61.0 (11)  |
| C    | 5493 (5)    | 1219 (5)    | 5733 (3)   | 68.9 (13)  |
| C4   | 2256 (6)    | 1898 (5)    | 6256 (3)   | 67.0 (12)  |
| C5   | 541 (5)     | 3063 (4)    | 5079 (3)   | 59.0 (11)  |
| C6   | -67 (5)     | 2804 (4)    | 5905 (3)   | 62.2 (12)  |
| O4   | 168 (5)     | 4963 (4)    | 2190 (2)   | 100.5 (12) |
| C7   | -1536 (6)   | 4746 (5)    | 3331 (3)   | 69.2 (13)  |
| C2   | 8430 (5)    | 1123 (4)    | 3947 (3)   | 67.6 (13)  |
| C8   | 2051 (5)    | 2708 (4)    | 4854 (3)   | 59.2 (11)  |
| C9   | -681 (5)    | 3692 (5)    | 4653 (3)   | 64.0 (12)  |
| C10  | 801 (6)     | 2228 (5)    | 6493 (3)   | 68.1 (12)  |
| O    | -2237 (5)   | 5994 (4)    | 2142 (3)   | 103.4 (12) |
| C11  | 6943 (6)    | 993 (5)     | 5332 (3)   | 76.0 (14)  |
| O3   | 10627 (4)   | 1017 (5)    | 1881 (3)   | 108.2 (13) |
| C12  | -2580 (6)   | 3136 (6)    | 6736 (3)   | 80.8 (15)  |
| C13  | 8825 (5)    | 1236 (5)    | 3089 (3)   | 72.9 (13)  |
| C14  | 10353 (6)   | 950 (5)     | 2682 (4)   | 81.1 (15)  |
| C15  | 7077 (5)    | 1325 (5)    | 4485 (3)   | 65.2 (12)  |
| C16  | -1916 (5)   | 3771 (5)    | 5227 (3)   | 65.5 (12)  |
| C17  | -3039 (7)   | 4958 (5)    | 3638 (3)   | 73.7 (14)  |
| C18  | 7789 (7)    | 1552 (6)    | 2565 (4)   | 88.3 (16)  |
| C19  | -1203 (7)   | 5273 (6)    | 2487 (3)   | 80.0 (15)  |
| N    | -4223 (6)   | 5123 (5)    | 3889 (3)   | 99.9 (15)  |
| C1a  | -3219 (6)   | 4356 (6)    | 7355 (3)   | 90.3 (16)  |
| N1c  | 7018 (6)    | 1784 (7)    | 2129 (4)   | 129 (2)    |
| C1d  | -4311 (10)  | 4243 (9)    | 8106 (5)   | 139 (3)    |
| C1e  | -3702 (15)  | 3139 (11)   | 8666 (8)   | 226 (6)    |
| C1g  | -4868 (15)  | 3175 (12)   | 9472 (6)   | 227 (6)    |

**Table 3 Anisotropic Displacement Parameters ( $\text{\AA}^2 \times 10^3$ ) for InT2CY\_030723\_0m.**  
**The Anisotropic displacement factor exponent takes the form:**

$$-2\pi^2[h^2a^2U_{11}+2hka*b*U_{12}+...].$$

| Atom | U <sub>11</sub> | U <sub>22</sub> | U <sub>33</sub> | U <sub>12</sub> | U <sub>13</sub> | U <sub>23</sub> |
|------|-----------------|-----------------|-----------------|-----------------|-----------------|-----------------|
| S2   | 65.2 (8)        | 76.4 (9)        | 76.3 (9)        | -34.1 (7)       | -24.9 (7)       | 15.3 (6)        |
| O2   | 63 (2)          | 123 (3)         | 98 (3)          | -40 (2)         | -31 (2)         | 21 (2)          |
| C21  | 65 (3)          | 56 (3)          | 66 (3)          | -28 (2)         | -18 (2)         | 1 (2)           |
| N20  | 66 (3)          | 69 (2)          | 74 (3)          | -36 (2)         | -17 (2)         | 7 (2)           |
| C1   | 62 (3)          | 59 (3)          | 69 (3)          | -24 (2)         | -16 (2)         | 2 (2)           |
| C3   | 70 (3)          | 56 (3)          | 61 (3)          | -32 (2)         | -16 (2)         | 1 (2)           |
| C    | 65 (3)          | 78 (3)          | 66 (3)          | -33 (3)         | -25 (3)         | 14 (2)          |
| C4   | 73 (3)          | 62 (3)          | 65 (3)          | -28 (3)         | -24 (3)         | 12 (2)          |
| C5   | 61 (3)          | 50 (2)          | 65 (3)          | -26 (2)         | -14 (2)         | 4 (2)           |
| C6   | 56 (3)          | 58 (3)          | 71 (3)          | -24 (2)         | -19 (2)         | 1 (2)           |
| O4   | 89 (3)          | 123 (3)         | 79 (3)          | -41 (2)         | -26 (2)         | 15 (2)          |
| C7   | 77 (3)          | 61 (3)          | 69 (3)          | -28 (2)         | -28 (3)         | 6 (2)           |
| C2   | 67 (3)          | 58 (3)          | 80 (4)          | -28 (2)         | -29 (3)         | 11 (2)          |
| C8   | 57 (3)          | 55 (2)          | 66 (3)          | -26 (2)         | -16 (2)         | 5 (2)           |
| C9   | 67 (3)          | 56 (3)          | 66 (3)          | -27 (2)         | -18 (3)         | 2 (2)           |
| C10  | 71 (3)          | 68 (3)          | 62 (3)          | -30 (3)         | -17 (3)         | 12 (2)          |
| O    | 111 (3)         | 122 (3)         | 97 (3)          | -61 (3)         | -54 (3)         | 42 (2)          |
| C11  | 81 (4)          | 72 (3)          | 83 (4)          | -37 (3)         | -34 (3)         | 11 (3)          |
| O3   | 88 (3)          | 162 (4)         | 82 (3)          | -67 (3)         | -20 (2)         | 21 (3)          |
| C12  | 66 (3)          | 97 (4)          | 84 (3)          | -48 (3)         | -5 (3)          | 6 (3)           |
| C13  | 68 (3)          | 72 (3)          | 80 (4)          | -29 (3)         | -26 (3)         | 6 (3)           |
| C14  | 77 (4)          | 78 (3)          | 86 (4)          | -38 (3)         | -15 (3)         | 7 (3)           |
| C15  | 68 (3)          | 58 (3)          | 82 (3)          | -37 (2)         | -25 (3)         | 7 (2)           |
| C16  | 62 (3)          | 63 (3)          | 76 (3)          | -31 (2)         | -20 (3)         | 4 (2)           |
| C17  | 74 (4)          | 66 (3)          | 86 (4)          | -31 (3)         | -32 (3)         | 11 (2)          |
| C18  | 88 (4)          | 102 (4)         | 78 (4)          | -49 (3)         | -19 (3)         | 13 (3)          |
| C19  | 80 (4)          | 94 (4)          | 75 (4)          | -47 (3)         | -24 (3)         | 6 (3)           |
| N    | 75 (3)          | 116 (4)         | 119 (4)         | -50 (3)         | -33 (3)         | 14 (3)          |
| C1a  | 86 (4)          | 107 (4)         | 76 (4)          | -47 (3)         | -8 (3)          | -4 (3)          |
| N1c  | 94 (4)          | 203 (7)         | 104 (4)         | -77 (4)         | -41 (3)         | 23 (4)          |
| C1d  | 147 (7)         | 151 (7)         | 104 (5)         | -71 (6)         | 1 (5)           | -4 (5)          |
| C1e  | 282 (15)        | 158 (9)         | 177 (10)        | -90 (9)         | 18 (10)         | 47 (8)          |
| C1g  | 325 (16)        | 223 (11)        | 123 (8)         | -155 (11)       | 16 (10)         | 23 (8)          |

**Table 4 Bond Lengths for InT2CY\_030723\_0m.**

| Atom | Atom | Length/\AA | Atom | Atom | Length/\AA |
|------|------|------------|------|------|------------|
| S2   | C3   | 1.721 (5)  | O4   | C19  | 1.283 (6)  |
| S2   | C15  | 1.727 (5)  | C7   | C17  | 1.444 (8)  |
| O2   | C14  | 1.250 (7)  | C7   | C19  | 1.484 (7)  |
| C21  | C3   | 1.461 (6)  | C2   | C13  | 1.372 (7)  |
| C21  | C4   | 1.437 (7)  | C2   | C15  | 1.404 (7)  |
| C21  | C8   | 1.370 (6)  | C9   | C16  | 1.375 (7)  |
| N20  | C6   | 1.384 (6)  | O    | C19  | 1.234 (6)  |
| N20  | C12  | 1.485 (6)  | C11  | C15  | 1.393 (7)  |
| N20  | C16  | 1.345 (6)  | O3   | C14  | 1.269 (7)  |
| C1   | C7   | 1.352 (6)  | C12  | C1a  | 1.489 (7)  |
| C1   | C9   | 1.430 (7)  | C13  | C14  | 1.468 (7)  |
| C3   | C    | 1.368 (6)  | C13  | C18  | 1.435 (8)  |
| C    | C11  | 1.412 (7)  | C17  | N    | 1.139 (6)  |
| C4   | C10  | 1.351 (7)  | C18  | N1c  | 1.126 (7)  |
| C5   | C6   | 1.418 (6)  | C1a  | C1d  | 1.508 (9)  |
| C5   | C8   | 1.397 (6)  | C1d  | C1e  | 1.444 (13) |
| C5   | C9   | 1.451 (6)  | C1e  | C1g  | 1.557 (14) |
| C6   | C10  | 1.386 (6)  |      |      |            |

**Table 5 Bond Angles for InT2CY\_030723\_0m.**

| Atom Atom Atom | Angle/°   | Atom Atom Atom | Angle/°    |
|----------------|-----------|----------------|------------|
| C15 S2 C3      | 93.0 (2)  | C5 C9 C1       | 122.8 (4)  |
| C4 C21 C3      | 119.3 (4) | C16 C9 C1      | 130.7 (5)  |
| C8 C21 C3      | 122.4 (4) | C16 C9 C5      | 106.5 (4)  |
| C8 C21 C4      | 118.3 (4) | C6 C10 C4      | 118.3 (5)  |
| C12 N20 C6     | 123.2 (4) | C15 C11 C      | 112.8 (5)  |
| C16 N20 C6     | 109.8 (4) | C1a C12 N20    | 112.6 (4)  |
| C16 N20 C12    | 126.9 (4) | C14 C13 C2     | 120.2 (5)  |
| C9 C1 C7       | 129.7 (5) | C18 C13 C2     | 121.1 (5)  |
| C21 C3 S2      | 121.0 (4) | C18 C13 C14    | 118.6 (5)  |
| C C3 S2        | 110.6 (4) | O3 C14 O2      | 123.5 (5)  |
| C C3 C21       | 128.4 (4) | C13 C14 O2     | 121.0 (5)  |
| C11 C C3       | 113.7 (5) | C13 C14 O3     | 115.5 (5)  |
| C10 C4 C21     | 122.6 (4) | C2 C15 S2      | 127.1 (4)  |
| C8 C5 C6       | 119.0 (4) | C11 C15 S2     | 109.9 (4)  |
| C9 C5 C6       | 106.1 (4) | C11 C15 C2     | 123.0 (5)  |
| C9 C5 C8       | 134.9 (4) | C9 C16 N20     | 110.3 (4)  |
| C5 C6 N20      | 107.3 (4) | N C17 C7       | 179.3 (6)  |
| C10 C6 N20     | 131.4 (5) | N1c C18 C13    | 177.5 (6)  |
| C10 C6 C5      | 121.3 (4) | C7 C19 O4      | 115.4 (5)  |
| C17 C7 C1      | 121.2 (5) | O C19 O4       | 125.5 (5)  |
| C19 C7 C1      | 122.5 (5) | O C19 C7       | 119.1 (5)  |
| C19 C7 C17     | 116.3 (5) | C1d C1a C12    | 110.3 (5)  |
| C15 C2 C13     | 131.7 (5) | C1e C1d C1a    | 116.8 (8)  |
| C5 C8 C21      | 120.5 (4) | C1g C1e C1d    | 114.0 (10) |

**Table 6 Torsion Angles for InT2CY\_030723\_0m.**

| A B C D         | Angle/°    | A B C D         | Angle/°    |
|-----------------|------------|-----------------|------------|
| S2 C3 C21 C4    | 175.9 (3)  | N20 C16 C9 C1   | -178.3 (3) |
| S2 C3 C21 C8    | -4.0 (4)   | N20 C16 C9 C5   | -0.7 (4)   |
| S2 C3 C C11     | 2.6 (3)    | C1 C7 C19 O4    | 8.8 (5)    |
| S2 C15 C2 C13   | -4.6 (5)   | C1 C7 C19 O     | -168.8 (5) |
| S2 C15 C11 C    | 0.2 (4)    | C1 C9 C5 C6     | 177.7 (4)  |
| O2 C14 C13 C2   | -0.7 (6)   | C1 C9 C5 C8     | -1.9 (5)   |
| O2 C14 C13 C18  | -177.1 (5) | C3 C C11 C15    | -1.9 (5)   |
| C21 C3 C C11    | -178.9 (5) | C C11 C15 C2    | -176.9 (4) |
| C21 C4 C10 C6   | 0.6 (5)    | C4 C10 C6 C5    | -0.9 (5)   |
| C21 C8 C5 C6    | -0.8 (5)   | O4 C19 C7 C17   | -173.9 (4) |
| C21 C8 C5 C9    | 178.7 (4)  | C2 C13 C14 O3   | 176.8 (5)  |
| N20 C6 C5 C8    | -179.5 (3) | O3 C14 C13 C18  | 0.4 (6)    |
| N20 C6 C5 C9    | 0.9 (4)    | C12 C1a C1d C1e | 68.8 (8)   |
| N20 C6 C10 C4   | 179.7 (5)  | C1a C1d C1e C1g | 174.3 (10) |
| N20 C12 C1a C1d | 176.7 (6)  |                 |            |



**Table 7 Hydrogen Atom Coordinates ( $\text{\AA} \times 10^4$ ) and Isotropic Displacement Parameters ( $\text{\AA}^2 \times 10^3$ ) for InT2CY\_030723\_0m.**

| Atom | x          | y          | z         | U(eq)      |
|------|------------|------------|-----------|------------|
| H8   | 2464 (5)   | 2863 (4)   | 4311 (3)  | 71.0 (13)  |
| H10  | 392 (6)    | 2073 (5)   | 7037 (3)  | 81.7 (15)  |
| H4   | 2847 (6)   | 1504 (5)   | 6646 (3)  | 80.4 (15)  |
| H1   | 432 (5)    | 4023 (4)   | 3551 (3)  | 78.2 (14)  |
| H    | 5233 (5)   | 1022 (5)   | 6294 (3)  | 82.6 (15)  |
| H2   | 9200 (5)   | 866 (4)    | 4222 (3)  | 81.2 (15)  |
| H11  | 7725 (6)   | 659 (5)    | 5605 (3)  | 91.2 (17)  |
| H12a | -3387 (6)  | 3077 (6)   | 6575 (3)  | 96.9 (18)  |
| H12b | -2039 (6)  | 2284 (6)   | 7006 (3)  | 96.9 (18)  |
| H16  | -2863 (5)  | 4142 (5)   | 5123 (3)  | 78.6 (15)  |
| H1aa | -2422 (6)  | 4387 (6)   | 7548 (3)  | 108 (2)    |
| H1ab | -3720 (6)  | 5217 (6)   | 7082 (3)  | 108 (2)    |
| H1da | -4845 (10) | 5128 (9)   | 8440 (5)  | 166 (3)    |
| H1db | -5036 (10) | 4114 (9)   | 7894 (5)  | 166 (3)    |
| H1ea | -3262 (15) | 2243 (11)  | 8353 (8)  | 272 (7)    |
| H1eb | -2912 (15) | 3208 (11)  | 8841 (8)  | 272 (7)    |
| H1ga | -5470 (90) | 2810 (120) | 9324 (15) | 340 (8)    |
| H1gb | -4361 (16) | 2610 (100) | 9890 (30) | 340 (8)    |
| H1gc | -5490 (90) | 4120 (20)  | 9700 (40) | 340 (8)    |
| H3   | 11105 (4)  | 223 (5)    | 1655 (3)  | 162 (2)    |
| Ha   | -2260 (5)  | 5506 (4)   | 1785 (3)  | 155.2 (19) |

**Table 8 Solvent masks information for InT2CY\_030723\_0m.**

| Number | X     | Y      | Z     | Volume | Electron count | Content |
|--------|-------|--------|-------|--------|----------------|---------|
| 1      | 0.113 | -0.450 | 0.000 | 548.7  | 63.274         | water   |

## Electrochemical Properties

### 1. cyclic voltammogramm

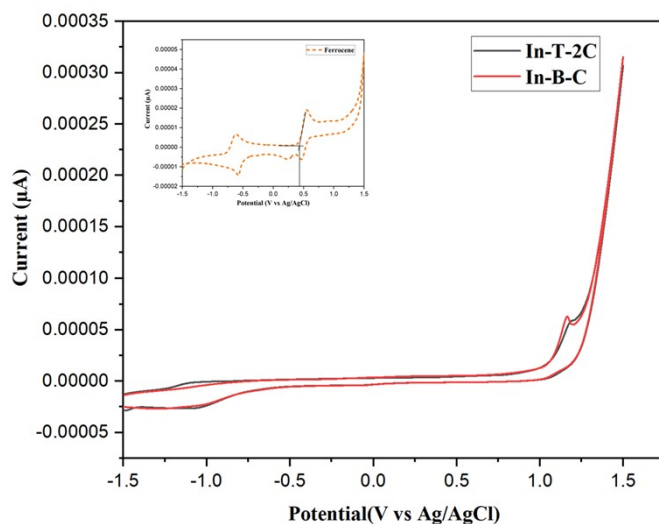

## Theoretical studies data

1. Optimized structures of all novel indole-based compounds

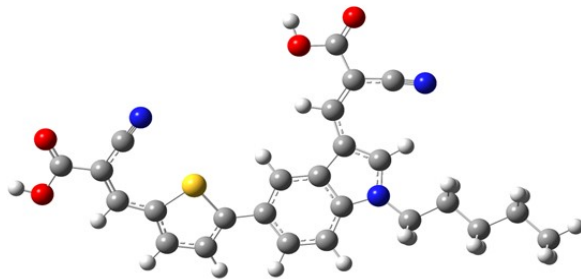

In-T-2C

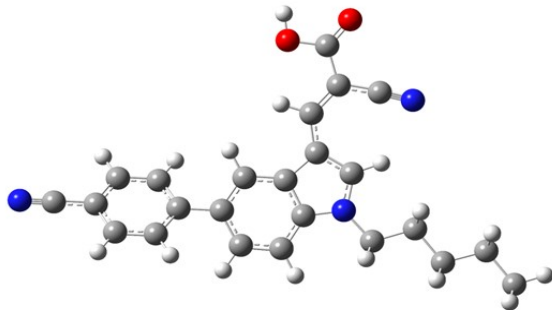

In-B-C

## DSSC Fabrication

1. Photoanodes

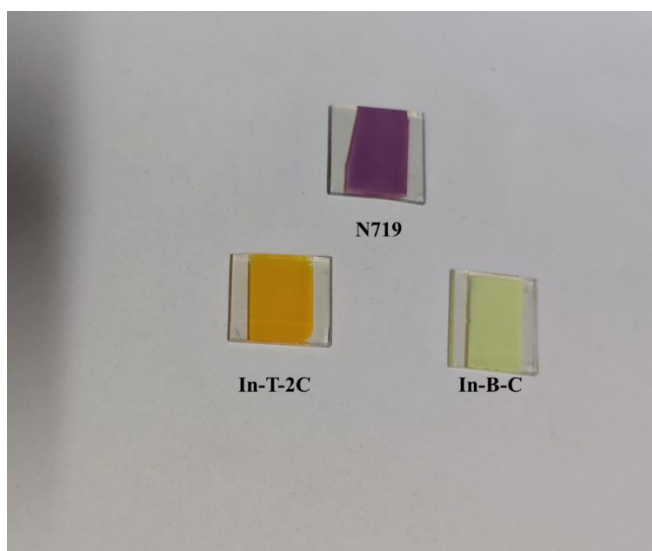

## Compared compounds and their details

1. 1,6-bis[3-((E)-2-carboxyl-2-cyanovinyl)indol-1-yl] hexane

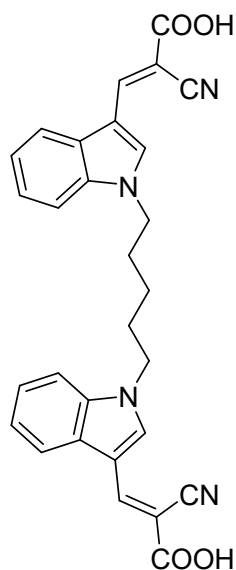

$$\lambda_{\max} = 379 \text{ nm}$$

$$\epsilon_{\max} (\text{M}^{-1} \text{ cm}^{-1}) = 35,769$$

$$E_{\text{LUMO}} = -2.27 \text{ eV}$$

$$\eta = 1.19 \%$$

2. 2-cyano-3-(1-(10-hexyl-10H-phenothiazin-3-yl)-1H-indol-3-yl)acrylic acid

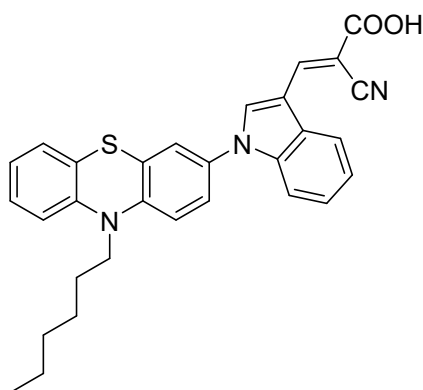

$$\lambda_{\max} = 379 \text{ nm}$$

$$\epsilon_{\max} (\text{M}^{-1} \text{ cm}^{-1}) = 21,320$$

$$E_{\text{LUMO}} = -1.75 \text{ eV}$$

$$\eta = 3.30 \%$$

3. 4-((E)-5-((Z)-1-cyano-2-(1-hexyl-1H-indol-3-yl)vinyl)thiophen-2-yl)methyleneamino)benzoic acid

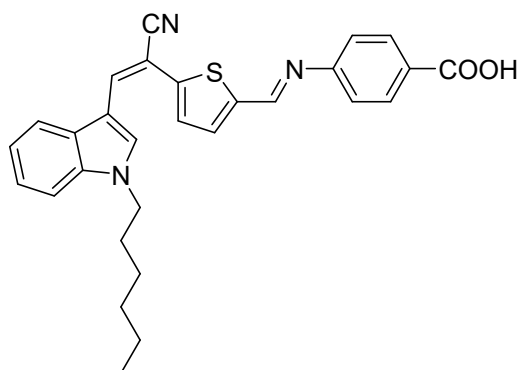

$$\lambda_{\max} = 452 \text{ nm}$$

$$\epsilon_{\max} (\text{M}^{-1} \text{ cm}^{-1}) = 67,000$$

$$E_{\text{LUMO}} = -3.54 \text{ eV}$$

$$\eta = 1.18 \%$$

4. 3-(6-(2-Cyano-2-cyanovinyl)-9-hexyl-9H-carbazol-3-yl)-2-cyanoacrylic acid

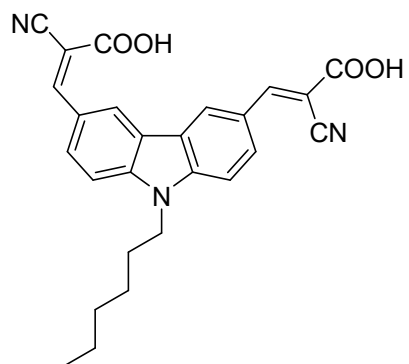

$$\lambda_{\text{max}} = 395 \text{ nm}$$

$$\epsilon_{\text{max}} (\text{M}^{-1} \text{ cm}^{-1}) = 56,000$$

$$E_{\text{LUMO}} = -2.69 \text{ eV}$$

$$\eta = 1.06 \%$$

5. 6-(2-cyano-2-(5-(2,2-dicyanovinyl)thiophen-2-yl)vinyl)-9-(2-ethylhexyl)-9H-carbazole-3-carboxylic acid

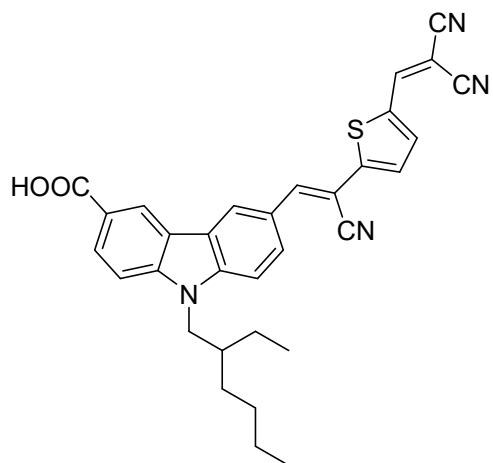

$$\lambda_{\text{max}} = 404 \text{ nm}$$

$$\epsilon_{\text{max}} (\text{M}^{-1} \text{ cm}^{-1}) = 22,900$$

$$E_{\text{LUMO}} = -0.74 \text{ eV}$$

$$\eta = 0.0027 \%$$
